# Supplementary material for: FIWARE-compatible Smart Data Models for Satellite Imagery and Flood Risk Assessment to Enhance Data Management
Source: Preprints.org preprint supplement (doi:10.20944/preprints202311.1613.v1), 2023-11-24
Supplement: Supplementary file 1 [file supplementary]

# PUC1 QUESTIONNAIRE

## PERSONAL INFORMATION

- What is your professional background?
  - ☐ Crisis management
  - ☐ Rescue service / Responder
  - ☐ Research
  - ☐ Technical/Technology
  - ☐ Other, please indicate [XXX] \_\_\_\_\_
  
- How many years of professional experience do you have?
  - ☐ 1-5 years   ☐ 5-10 years   ☐ 10-15 years   ☐ More than 15 years
  
- What is your nationality?<sup>1</sup> [XXX] \_\_\_\_\_
  
- Gender?<sup>2</sup>
  - ☐ Female   ☐ Male   ☐ Other
  
- How much would you agree with the statement “You have experience and knowledge regarding monitoring the safety and security of the aqueducts?”
  - ☐ Strongly agree   ☐ Agree   ☐ Neutral   ☐ Disagree   ☐ Strongly disagree
  
- What was your role in the exercise?
  - ☐ Operator   ☐ Observer   ☐ Participant   ☐ Other, please indicate [xxx]
  
- What is your aqua3S ID? [XXX] \_\_\_\_\_

---

<sup>1</sup> This can assist us with taking the national/cultural/linguistic balance of aqua3S into consideration. We'd like to see whether the opinions on using the platform differ among various backgrounds.

<sup>2</sup> This can assist us with taking the gender balance of aqua3S into consideration. We'd like to see whether the opinions on using the platform differ among genders.

## SYSTEM USABILITY QUESTIONNAIRE

1. I think that I would like to use this system frequently

**Strongly  
disagree**

**Strongly  
Agree**

|                          |                          |                          |                          |                          |
|--------------------------|--------------------------|--------------------------|--------------------------|--------------------------|
| <input type="checkbox"/> |
|--------------------------|--------------------------|--------------------------|--------------------------|--------------------------|

2. I found the system unnecessarily complex

**Strongly  
disagree**

**Strongly  
Agree**

|                          |                          |                          |                          |                          |
|--------------------------|--------------------------|--------------------------|--------------------------|--------------------------|
| <input type="checkbox"/> |
|--------------------------|--------------------------|--------------------------|--------------------------|--------------------------|

3. I thought the system was easy to use

**Strongly  
disagree**

**Strongly  
Agree**

|                          |                          |                          |                          |                          |
|--------------------------|--------------------------|--------------------------|--------------------------|--------------------------|
| <input type="checkbox"/> |
|--------------------------|--------------------------|--------------------------|--------------------------|--------------------------|

4. I think that I would need the support of a technical person to be able to use this system

**Strongly  
disagree**

**Strongly  
Agree**

|                          |                          |                          |                          |                          |
|--------------------------|--------------------------|--------------------------|--------------------------|--------------------------|
| <input type="checkbox"/> |
|--------------------------|--------------------------|--------------------------|--------------------------|--------------------------|

5. I found the various functions in this system were well integrated

**Strongly  
disagree**

**Strongly  
Agree**

|                          |                          |                          |                          |                          |
|--------------------------|--------------------------|--------------------------|--------------------------|--------------------------|
| <input type="checkbox"/> |
|--------------------------|--------------------------|--------------------------|--------------------------|--------------------------|

6. I thought there was too much inconsistency in this system

**Strongly  
disagree**

**Strongly  
Agree**

|                          |                          |                          |                          |                          |
|--------------------------|--------------------------|--------------------------|--------------------------|--------------------------|
| <input type="checkbox"/> |
|--------------------------|--------------------------|--------------------------|--------------------------|--------------------------|

7. I would imagine that most people would learn to use this system very quickly

Strongly  
disagree

Strongly  
Agree

|                          |                          |                          |                          |                          |
|--------------------------|--------------------------|--------------------------|--------------------------|--------------------------|
| <input type="checkbox"/> |
|--------------------------|--------------------------|--------------------------|--------------------------|--------------------------|

8. I found the system very cumbersome to use

Strongly  
disagree

Strongly  
Agree

|                          |                          |                          |                          |                          |
|--------------------------|--------------------------|--------------------------|--------------------------|--------------------------|
| <input type="checkbox"/> |
|--------------------------|--------------------------|--------------------------|--------------------------|--------------------------|

9. I felt very confident using the system

Strongly  
disagree

Strongly  
Agree

|                          |                          |                          |                          |                          |
|--------------------------|--------------------------|--------------------------|--------------------------|--------------------------|
| <input type="checkbox"/> |
|--------------------------|--------------------------|--------------------------|--------------------------|--------------------------|

10. I needed to learn a lot of things before I could get going with this system

Strongly  
disagree

Strongly  
Agree

|                          |                          |                          |                          |                          |
|--------------------------|--------------------------|--------------------------|--------------------------|--------------------------|
| <input type="checkbox"/> |
|--------------------------|--------------------------|--------------------------|--------------------------|--------------------------|

**Other comments:**

[xxx]

## EXERCISE DIMENSION

|                                                                                                                                                                   | Strongly Agree           | Agree                    | Neutral                  | Disagree                 | Strongly Disagree        | Not Applicable           |
|-------------------------------------------------------------------------------------------------------------------------------------------------------------------|--------------------------|--------------------------|--------------------------|--------------------------|--------------------------|--------------------------|
| The number of participants involved in the exercise sessions was adequate for the tasks, and to evaluate the solutions and their impact on the crisis management. | <input type="checkbox"/> |

[You can add your justification here]

*Please, add justification here*

|                                                                                                                                                                      | Strongly Agree           | Agree                    | Neutral                  | Disagree                 | Strongly Disagree        | Not Applicable           |
|----------------------------------------------------------------------------------------------------------------------------------------------------------------------|--------------------------|--------------------------|--------------------------|--------------------------|--------------------------|--------------------------|
| The background of participants involved in the exercise sessions was adequate to the tasks, and to evaluate the solutions and their impact on the crisis management. | <input type="checkbox"/> |

*Please, add justification here*

|                                                                                                                                                                | Strongly Agree           | Agree                    | Neutral                  | Disagree                 | Strongly Disagree        | Not Applicable           |
|----------------------------------------------------------------------------------------------------------------------------------------------------------------|--------------------------|--------------------------|--------------------------|--------------------------|--------------------------|--------------------------|
| The level of involvement of participants of the exercise sessions was adequate and enough to evaluate the solutions and their impact on the crisis management. | <input type="checkbox"/> |

*Please, add justification here*

|                                                                                                                                                                         | Strongly Agree           | Agree                    | Neutral                  | Disagree                 | Strongly Disagree        | Not Applicable           |
|-------------------------------------------------------------------------------------------------------------------------------------------------------------------------|--------------------------|--------------------------|--------------------------|--------------------------|--------------------------|--------------------------|
| There were no organisational or logistics constraints (e. g. time management, infrastructure preparation) that influenced the quality and completeness of the exercise. | <input type="checkbox"/> |

*Please, add justification here*

|                                                                                                                                                                                                                  | Strongly Agree           | Agree                    | Neutral                  | Disagree                 | Strongly Disagree        | Not Applicable           |
|------------------------------------------------------------------------------------------------------------------------------------------------------------------------------------------------------------------|--------------------------|--------------------------|--------------------------|--------------------------|--------------------------|--------------------------|
| There were no external constraints (e. g. missing participants, emergency situation, technical breakdown, indisposition of key personnel) that influenced the quality and completeness of the exercise sessions. | <input type="checkbox"/> |

*Please, add justification here*

|                                                                                                                                                   | Strongly Agree           | Agree                    | Neutral                  | Disagree                 | Strongly Disagree        | Not Applicable           |
|---------------------------------------------------------------------------------------------------------------------------------------------------|--------------------------|--------------------------|--------------------------|--------------------------|--------------------------|--------------------------|
| The setup of the exercise was clear and every person involved in the Trial knew their role and responsibilities for all the activities organised. | <input type="checkbox"/> |

*Please, add justification here*

|                                                                                             | Strongly Agree           | Agree                    | Neutral                  | Disagree                 | Strongly Disagree        | Not Applicable           |
|---------------------------------------------------------------------------------------------|--------------------------|--------------------------|--------------------------|--------------------------|--------------------------|--------------------------|
| The safety measures were adequately planned, explained and implemented during the exercise. | <input type="checkbox"/> |

*Please, add justification here*

|                                    | Strongly Agree           | Agree                    | Neutral                  | Disagree                 | Strongly Disagree        | Not Applicable           |
|------------------------------------|--------------------------|--------------------------|--------------------------|--------------------------|--------------------------|--------------------------|
| The exercise was conducted safely. | <input type="checkbox"/> |

*Please, add justification here*

|                                                                                                         | Strongly Agree           | Agree                    | Neutral                  | Disagree                 | Strongly Disagree        | Not Applicable           |
|---------------------------------------------------------------------------------------------------------|--------------------------|--------------------------|--------------------------|--------------------------|--------------------------|--------------------------|
| The scenario of the exercise was realistic (the system has been used as it would be in the real-world). | <input type="checkbox"/> |

Please, add justification here

|                                                                     | Strongly Agree           | Agree                    | Neutral                  | Disagree                 | Strongly Disagree        | Not Applicable           |
|---------------------------------------------------------------------|--------------------------|--------------------------|--------------------------|--------------------------|--------------------------|--------------------------|
| The injects from role players and the story telling were realistic. | <input type="checkbox"/> |

Please, add justification here

|                                                               | Strongly Agree           | Agree                    | Neutral                  | Disagree                 | Strongly Disagree        | Not Applicable           |
|---------------------------------------------------------------|--------------------------|--------------------------|--------------------------|--------------------------|--------------------------|--------------------------|
| The simulation helps with the understanding of the situation. | <input type="checkbox"/> |

Please, add justification here

|                                                                       | Strongly Agree           | Agree                    | Neutral                  | Disagree                 | Strongly Disagree        | Not Applicable           |
|-----------------------------------------------------------------------|--------------------------|--------------------------|--------------------------|--------------------------|--------------------------|--------------------------|
| I am satisfied with the participation and conduction of the exercise. | <input type="checkbox"/> |

Please, add justification here

---

## aqua3S as a system

|                                                                                                                                  | Strongly Agree           | Agree                    | Neutral                  | Disagree                 | Strongly Disagree        | Not Applicable           |
|----------------------------------------------------------------------------------------------------------------------------------|--------------------------|--------------------------|--------------------------|--------------------------|--------------------------|--------------------------|
| The exercise sessions scenario was adequate to evaluate the solution and its impact on the crisis management for <b>aqua3S</b> . | <input type="checkbox"/> |
| <i>Please, add justification here</i>                                                                                            |                          |                          |                          |                          |                          |                          |

|                                                                                                                                                         | Strongly Agree           | Agree                    | Neutral                  | Disagree                 | Strongly Disagree        | Not Applicable           |
|---------------------------------------------------------------------------------------------------------------------------------------------------------|--------------------------|--------------------------|--------------------------|--------------------------|--------------------------|--------------------------|
| The technical setup of solution <b>aqua3S</b> was complete, professional and adequate to evaluate the solution and its impact on the crisis management. | <input type="checkbox"/> |
| <i>Please, add here justification</i>                                                                                                                   |                          |                          |                          |                          |                          |                          |

How much do you agree with the following statements that an automated exchange of data between different IT solutions leads to:

|                                                                                            | Strongly Agree           | Agree                    | Neutral                  | Disagree                 | Strongly Disagree        | Not Applicable           |
|--------------------------------------------------------------------------------------------|--------------------------|--------------------------|--------------------------|--------------------------|--------------------------|--------------------------|
| <i>Less time needed for practitioners in their search for crisis relevant information.</i> | <input type="checkbox"/> |
| <i>Please, add justification here</i>                                                      |                          |                          |                          |                          |                          |                          |

|                                                                                                                         | Strongly Agree           | Agree                    | Neutral                  | Disagree                 | Strongly Disagree        | Not Applicable           |
|-------------------------------------------------------------------------------------------------------------------------|--------------------------|--------------------------|--------------------------|--------------------------|--------------------------|--------------------------|
| <i>Less time needed for practitioners to read data from one solution and enter data manually into another solution.</i> | <input type="checkbox"/> |
| <i>Please, add justification here</i>                                                                                   |                          |                          |                          |                          |                          |                          |

|  | Strongly | Agree | Neutral | Disagree | Strongly | Not Applicable |
|--|----------|-------|---------|----------|----------|----------------|
|--|----------|-------|---------|----------|----------|----------------|

|                                                                                                                  | Agree                    |                          |                          |                          | Disagree                 |                          |
|------------------------------------------------------------------------------------------------------------------|--------------------------|--------------------------|--------------------------|--------------------------|--------------------------|--------------------------|
| Lower probability for wrong information caused by human errors while reading/entering data from/into a solution. | <input type="checkbox"/> |
| Please, add justification here                                                                                   |                          |                          |                          |                          |                          |                          |

|                                                                                                    | Strongly Agree           | Agree                    | Neutral                  | Disagree                 | Strongly Disagree        | Not Applicable           |
|----------------------------------------------------------------------------------------------------|--------------------------|--------------------------|--------------------------|--------------------------|--------------------------|--------------------------|
| More time for practitioners to define, communicate, execute and supervise crisis response actions. | <input type="checkbox"/> |
| Please, add justification here                                                                     |                          |                          |                          |                          |                          |                          |

|                                                                                                                         | Strongly Agree           | Agree                    | Neutral                  | Disagree                 | Strongly Disagree        | Not Applicable           |
|-------------------------------------------------------------------------------------------------------------------------|--------------------------|--------------------------|--------------------------|--------------------------|--------------------------|--------------------------|
| Better quality of the crisis management results due to the saved time, better quality of data and better communication. | <input type="checkbox"/> |
| Please, add justification here                                                                                          |                          |                          |                          |                          |                          |                          |



## aqua3S per module

### Preparedness Assessment module

|  | Strongly Agree | Agree | Neutral | Disagree | Strongly Disagree |
|--|----------------|-------|---------|----------|-------------------|
|--|----------------|-------|---------|----------|-------------------|

The use of the Preparedness Assessment module was useful for the successful implementation of the scenario.

|                          |                          |                          |                          |                          |                          |
|--------------------------|--------------------------|--------------------------|--------------------------|--------------------------|--------------------------|
| <input type="checkbox"/> |
|--------------------------|--------------------------|--------------------------|--------------------------|--------------------------|--------------------------|

(usefulness = the module has a practical and beneficial application)

Please, add justification here

---

|  | Strongly Agree | Agree | Neutral | Disagree | Strongly Disagree |
|--|----------------|-------|---------|----------|-------------------|
|--|----------------|-------|---------|----------|-------------------|

The use of the Preparedness Assessment module was efficient for the successful implementation of the scenario.

|                          |                          |                          |                          |                          |                          |
|--------------------------|--------------------------|--------------------------|--------------------------|--------------------------|--------------------------|
| <input type="checkbox"/> |
|--------------------------|--------------------------|--------------------------|--------------------------|--------------------------|--------------------------|

(efficiency = user-friendliness of the module and overall time spent to perform the task)

Please, add justification here

---

|  | Strongly Agree | Agree | Neutral | Disagree | Strongly Disagree |
|--|----------------|-------|---------|----------|-------------------|
|--|----------------|-------|---------|----------|-------------------|

The use of Preparedness Assessment module was effective for the successful implementation of the scenario.

|                          |                          |                          |                          |                          |                          |
|--------------------------|--------------------------|--------------------------|--------------------------|--------------------------|--------------------------|
| <input type="checkbox"/> |
|--------------------------|--------------------------|--------------------------|--------------------------|--------------------------|--------------------------|

(effectiveness = no additional support was needed to use the module and no errors were noticed)

Please, add justification here

---

## Continuity Scenarios module

Strongly Agree    Agree    Neutral    Disagree    Strongly Disagree

The use of the Continuity Scenarios module was useful for the successful implementation of the scenario.

|                          |                          |                          |                          |                          |
|--------------------------|--------------------------|--------------------------|--------------------------|--------------------------|
| <input type="checkbox"/> |
|--------------------------|--------------------------|--------------------------|--------------------------|--------------------------|

(usefulness = the module has a practical and beneficial application)

Please, add justification here

---

Strongly Agree    Agree    Neutral    Disagree    Strongly Disagree

The use of the Continuity Scenarios module was efficient for the successful implementation of the scenario.

|                          |                          |                          |                          |                          |
|--------------------------|--------------------------|--------------------------|--------------------------|--------------------------|
| <input type="checkbox"/> |
|--------------------------|--------------------------|--------------------------|--------------------------|--------------------------|

(efficiency = user-friendliness of the module and overall time spent to perform the task)

Please, add justification here

---

Strongly Agree    Agree    Neutral    Disagree    Strongly Disagree

The use of Continuity Scenarios module was effective for the successful implementation of the scenario.

|                          |                          |                          |                          |                          |
|--------------------------|--------------------------|--------------------------|--------------------------|--------------------------|
| <input type="checkbox"/> |
|--------------------------|--------------------------|--------------------------|--------------------------|--------------------------|

(effectiveness = no additional support was needed to use the module and no errors were noticed)

Please, add justification here

---

## Sensor Maps module

Strongly Agree    Agree    Neutral    Disagree    Strongly Disagree

The use of the Sensor Maps module was useful for the successful implementation of the scenario.

|                          |                          |                          |                          |                          |
|--------------------------|--------------------------|--------------------------|--------------------------|--------------------------|
| <input type="checkbox"/> |
|--------------------------|--------------------------|--------------------------|--------------------------|--------------------------|

(usefulness = the module has a practical and beneficial application)

Please, add justification here

---

Strongly Agree    Agree    Neutral    Disagree    Strongly Disagree

The use of the Sensor Maps module was efficient for the successful implementation of the scenario.

|                          |                          |                          |                          |                          |
|--------------------------|--------------------------|--------------------------|--------------------------|--------------------------|
| <input type="checkbox"/> |
|--------------------------|--------------------------|--------------------------|--------------------------|--------------------------|

(efficiency = user-friendliness of the module and overall time spent to perform the task)

Please, add justification here

---

Strongly Agree    Agree    Neutral    Disagree    Strongly Disagree

The use of the Sensor Maps module was effective for the successful implementation of the scenario.

|                          |                          |                          |                          |                          |
|--------------------------|--------------------------|--------------------------|--------------------------|--------------------------|
| <input type="checkbox"/> |
|--------------------------|--------------------------|--------------------------|--------------------------|--------------------------|

(effectiveness = no additional support was needed to use the module and no errors were noticed)

Please, add justification here

---

## Social Media Data module

|                                                                                                              | Strongly Agree           | Agree                    | Neutral                  | Disagree                 | Strongly Disagree        |
|--------------------------------------------------------------------------------------------------------------|--------------------------|--------------------------|--------------------------|--------------------------|--------------------------|
| The use of the Social Media Data module was <u>useful</u> for the successful implementation of the scenario. | <input type="checkbox"/> |
| <i>(<u>usefulness</u> = the module has a practical and beneficial application)</i>                           |                          |                          |                          |                          |                          |

Please, add justification here

---

|                                                                                                                 | Strongly Agree           | Agree                    | Neutral                  | Disagree                 | Strongly Disagree        |
|-----------------------------------------------------------------------------------------------------------------|--------------------------|--------------------------|--------------------------|--------------------------|--------------------------|
| The use of the Social Media Data module was <u>efficient</u> for the successful implementation of the scenario. | <input type="checkbox"/> |
| <i>(<u>efficiency</u> = user-friendliness of the module and overall time spent to perform the task)</i>         |                          |                          |                          |                          |                          |

Please, add justification here

---

|                                                                                                                 | Strongly Agree           | Agree                    | Neutral                  | Disagree                 | Strongly Disagree        |
|-----------------------------------------------------------------------------------------------------------------|--------------------------|--------------------------|--------------------------|--------------------------|--------------------------|
| The use of the Social Media Data module was <u>effective</u> for the successful implementation of the scenario. | <input type="checkbox"/> |
| <i>(<u>effectiveness</u> = no additional support was needed to use the module and no errors were noticed)</i>   |                          |                          |                          |                          |                          |

Please, add justification here

## Satellite Data module

Strongly Agree    Agree    Neutral    Disagree    Strongly Disagree

The use of the Satellite Data module was useful for the successful implementation of the scenario.

☐    ☐    ☐    ☐    ☐

(usefulness = the module has a practical and beneficial application)

Please, add justification here

Strongly Agree    Agree    Neutral    Disagree    Strongly Disagree

The use of the Satellite Data module was efficient for the successful implementation of the scenario.

☐    ☐    ☐    ☐    ☐

(efficiency = user-friendliness of the module and overall time spent to perform the task)

Please, add justification here

Strongly Agree    Agree    Neutral    Disagree    Strongly Disagree

The use of the Satellite Data module was effective for the successful implementation of the scenario.

☐    ☐    ☐    ☐    ☐

(effectiveness = no additional support was needed to use the module and no errors were noticed)

Please, add justification here

## Crisis Maps module

Strongly Agree    Agree    Neutral    Disagree    Strongly Disagree

The use of the Crisis Maps module was useful for the successful implementation of the scenario.

|                          |                          |                          |                          |                          |
|--------------------------|--------------------------|--------------------------|--------------------------|--------------------------|
| <input type="checkbox"/> |
|--------------------------|--------------------------|--------------------------|--------------------------|--------------------------|

(usefulness = the module has a practical and beneficial application)

Please, add justification here

---

Strongly Agree    Agree    Neutral    Disagree    Strongly Disagree

The use of the Crisis Maps module was efficient for the successful implementation of the scenario.

|                          |                          |                          |                          |                          |
|--------------------------|--------------------------|--------------------------|--------------------------|--------------------------|
| <input type="checkbox"/> |
|--------------------------|--------------------------|--------------------------|--------------------------|--------------------------|

(efficiency = user-friendliness of the module and overall time spent to perform the task)

Please, add justification here

---

Strongly Agree    Agree    Neutral    Disagree    Strongly Disagree

The use of the Crisis Maps module was effective for the successful implementation of the scenario.

|                          |                          |                          |                          |                          |
|--------------------------|--------------------------|--------------------------|--------------------------|--------------------------|
| <input type="checkbox"/> |
|--------------------------|--------------------------|--------------------------|--------------------------|--------------------------|

(effectiveness = no additional support was needed to use the module and no errors were noticed)

Please, add justification here

## Sensor Graphs module

Strongly Agree    Agree    Neutral    Disagree    Strongly Disagree

The use of the Sensor Graphs module was useful for the successful implementation of the scenario.

☐    ☐    ☐    ☐    ☐

(usefulness = the module has a practical and beneficial application)

Please, add justification here

Strongly Agree    Agree    Neutral    Disagree    Strongly Disagree

The use of the Sensor Graphs module was efficient for the successful implementation of the scenario.

☐    ☐    ☐    ☐    ☐

(efficiency = user-friendliness of the module and overall time spent to perform the task)

Please, add justification here

Strongly Agree    Agree    Neutral    Disagree    Strongly Disagree

The use of the Sensor Graphs module was effective for the successful implementation of the scenario.

☐    ☐    ☐    ☐    ☐

(effectiveness = no additional support was needed to use the module and no errors were noticed)

Please, add justification here

## Social Media Graphs module

|                                                                                                                | Strongly Agree           | Agree                    | Neutral                  | Disagree                 | Strongly Disagree        |
|----------------------------------------------------------------------------------------------------------------|--------------------------|--------------------------|--------------------------|--------------------------|--------------------------|
| The use of the Social Media Graphs module was <u>useful</u> for the successful implementation of the scenario. | <input type="checkbox"/> |
| <i>(<u>usefulness</u> = the module has a practical and beneficial application)</i>                             |                          |                          |                          |                          |                          |

Please, add justification here

---

|                                                                                                                   | Strongly Agree           | Agree                    | Neutral                  | Disagree                 | Strongly Disagree        |
|-------------------------------------------------------------------------------------------------------------------|--------------------------|--------------------------|--------------------------|--------------------------|--------------------------|
| The use of the Social Media Graphs module was <u>efficient</u> for the successful implementation of the scenario. | <input type="checkbox"/> |
| <i>(<u>efficiency</u> = user-friendliness of the module and overall time spent to perform the task)</i>           |                          |                          |                          |                          |                          |

Please, add justification here

---

|                                                                                                                   | Strongly Agree           | Agree                    | Neutral                  | Disagree                 | Strongly Disagree        |
|-------------------------------------------------------------------------------------------------------------------|--------------------------|--------------------------|--------------------------|--------------------------|--------------------------|
| The use of the Social Media Graphs module was <u>effective</u> for the successful implementation of the scenario. | <input type="checkbox"/> |
| <i>(<u>effectiveness</u> = no additional support was needed to use the module and no errors were noticed)</i>     |                          |                          |                          |                          |                          |

Please, add justification here



## Sensor Alerts module

Strongly Agree    Agree    Neutral    Disagree    Strongly Disagree

The use of the Sensor Alerts module was useful for the successful implementation of the scenario.

☐    ☐    ☐    ☐    ☐

(usefulness = the module has a practical and beneficial application)

Please, add justification here

Strongly Agree    Agree    Neutral    Disagree    Strongly Disagree

The use of the Sensor Alerts module was efficient for the successful implementation of the scenario.

☐    ☐    ☐    ☐    ☐

(efficiency = user-friendliness of the module and overall time spent to perform the task)

Please, add justification here

Strongly Agree    Agree    Neutral    Disagree    Strongly Disagree

The use of the Sensor Alerts module was effective for the successful implementation of the scenario.

☐    ☐    ☐    ☐    ☐

(effectiveness = no additional support was needed to use the module and no errors were noticed)

Please, add justification here

## Intervention Management Model module

|                                                                                                                          | Strongly Agree           | Agree                    | Neutral                  | Disagree                 | Strongly Disagree        |
|--------------------------------------------------------------------------------------------------------------------------|--------------------------|--------------------------|--------------------------|--------------------------|--------------------------|
| The use of the Intervention Management Model module was <u>useful</u> for the successful implementation of the scenario. | <input type="checkbox"/> |
| <i>(<u>usefulness</u> = the module has a practical and beneficial application)</i>                                       |                          |                          |                          |                          |                          |

Please, add justification here

---

|                                                                                                                             | Strongly Agree           | Agree                    | Neutral                  | Disagree                 | Strongly Disagree        |
|-----------------------------------------------------------------------------------------------------------------------------|--------------------------|--------------------------|--------------------------|--------------------------|--------------------------|
| The use of the Intervention Management Model module was <u>efficient</u> for the successful implementation of the scenario. | <input type="checkbox"/> |
| <i>(<u>efficiency</u> = user-friendliness of the module and overall time spent to perform the task)</i>                     |                          |                          |                          |                          |                          |

Please, add justification here

---

|                                                                                                                             | Strongly Agree           | Agree                    | Neutral                  | Disagree                 | Strongly Disagree        |
|-----------------------------------------------------------------------------------------------------------------------------|--------------------------|--------------------------|--------------------------|--------------------------|--------------------------|
| The use of the Intervention Management Model module was <u>effective</u> for the successful implementation of the scenario. | <input type="checkbox"/> |
| <i>(<u>effectiveness</u> = no additional support was needed to use the module and no errors were noticed)</i>               |                          |                          |                          |                          |                          |

Please, add justification here
